# Supplementary material for: Ultra-thin, transparent and flexible tactile sensors based on graphene films with excellent anti-interference
Source: Royal Society of Chemistry journal article supplement (doi:10.1039/c7ra04239f), 2017-01-01
Supplement: c7ra04239f1.pdf [file c7ra04239f1.pdf]

## Electronic Supporting Information

# Ultra-thin, Transparent and Flexible Tactile Sensors Based on Graphene Films with Excellent Anti-interference

Minxuan Xu <sup>a</sup>, Junjie Qi <sup>a\*</sup>, Feng Li <sup>a</sup>, Xinqin Liao <sup>a</sup>, Shuo Liu <sup>a</sup>, and Yue Zhang <sup>a,b\*</sup>

<sup>1</sup> School of Materials Science and Engineering, State Key Laboratory for Advanced Metals and Materials, University of Science and Technology Beijing, Beijing 100083, China

<sup>2</sup> The Beijing Municipal Key Laboratory of New Energy Materials and Technologies, University of Science and Technology Beijing, Beijing 100083, China

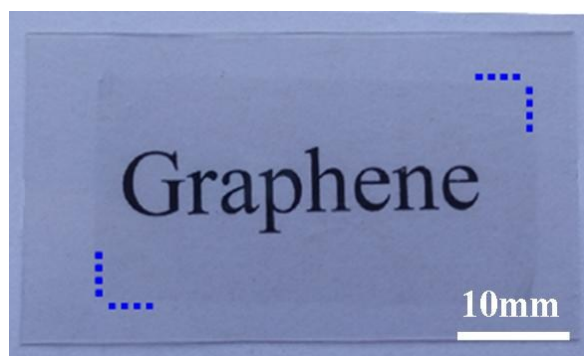

**Figure S1.** Optical image of transferring graphene film with a size of 40×20mm.

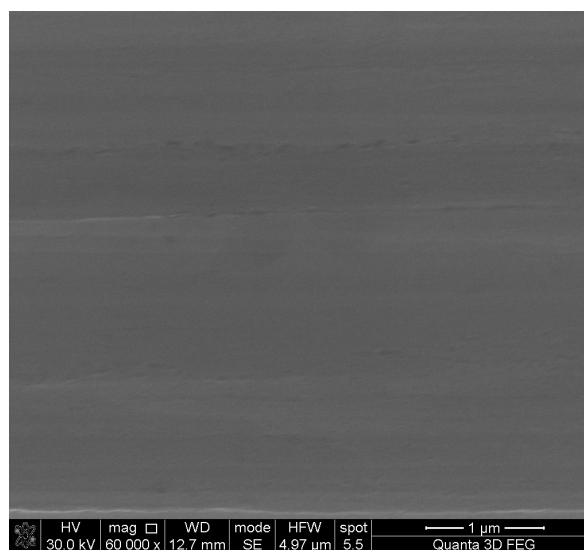

**Figure S2.** FESEM image of the graphene film on the copper foil substrate

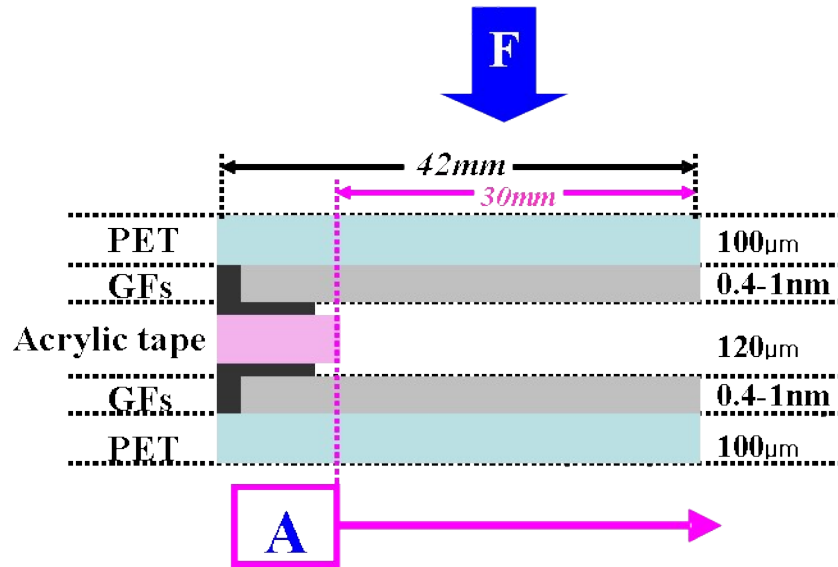

Figure S3. A schematic cross-sectional view of the device
